# Supplementary material for: Associations of context-specific sitting time with markers of cardiometabolic risk in Australian adults
Source: PubMed Central journal article supplement (PMC6245709; doi:10.1186/s12966-018-0748-3), 2018-11-20

LTPA, Leisure-time physical activity  
CMB-R, Cardiometabolic risk

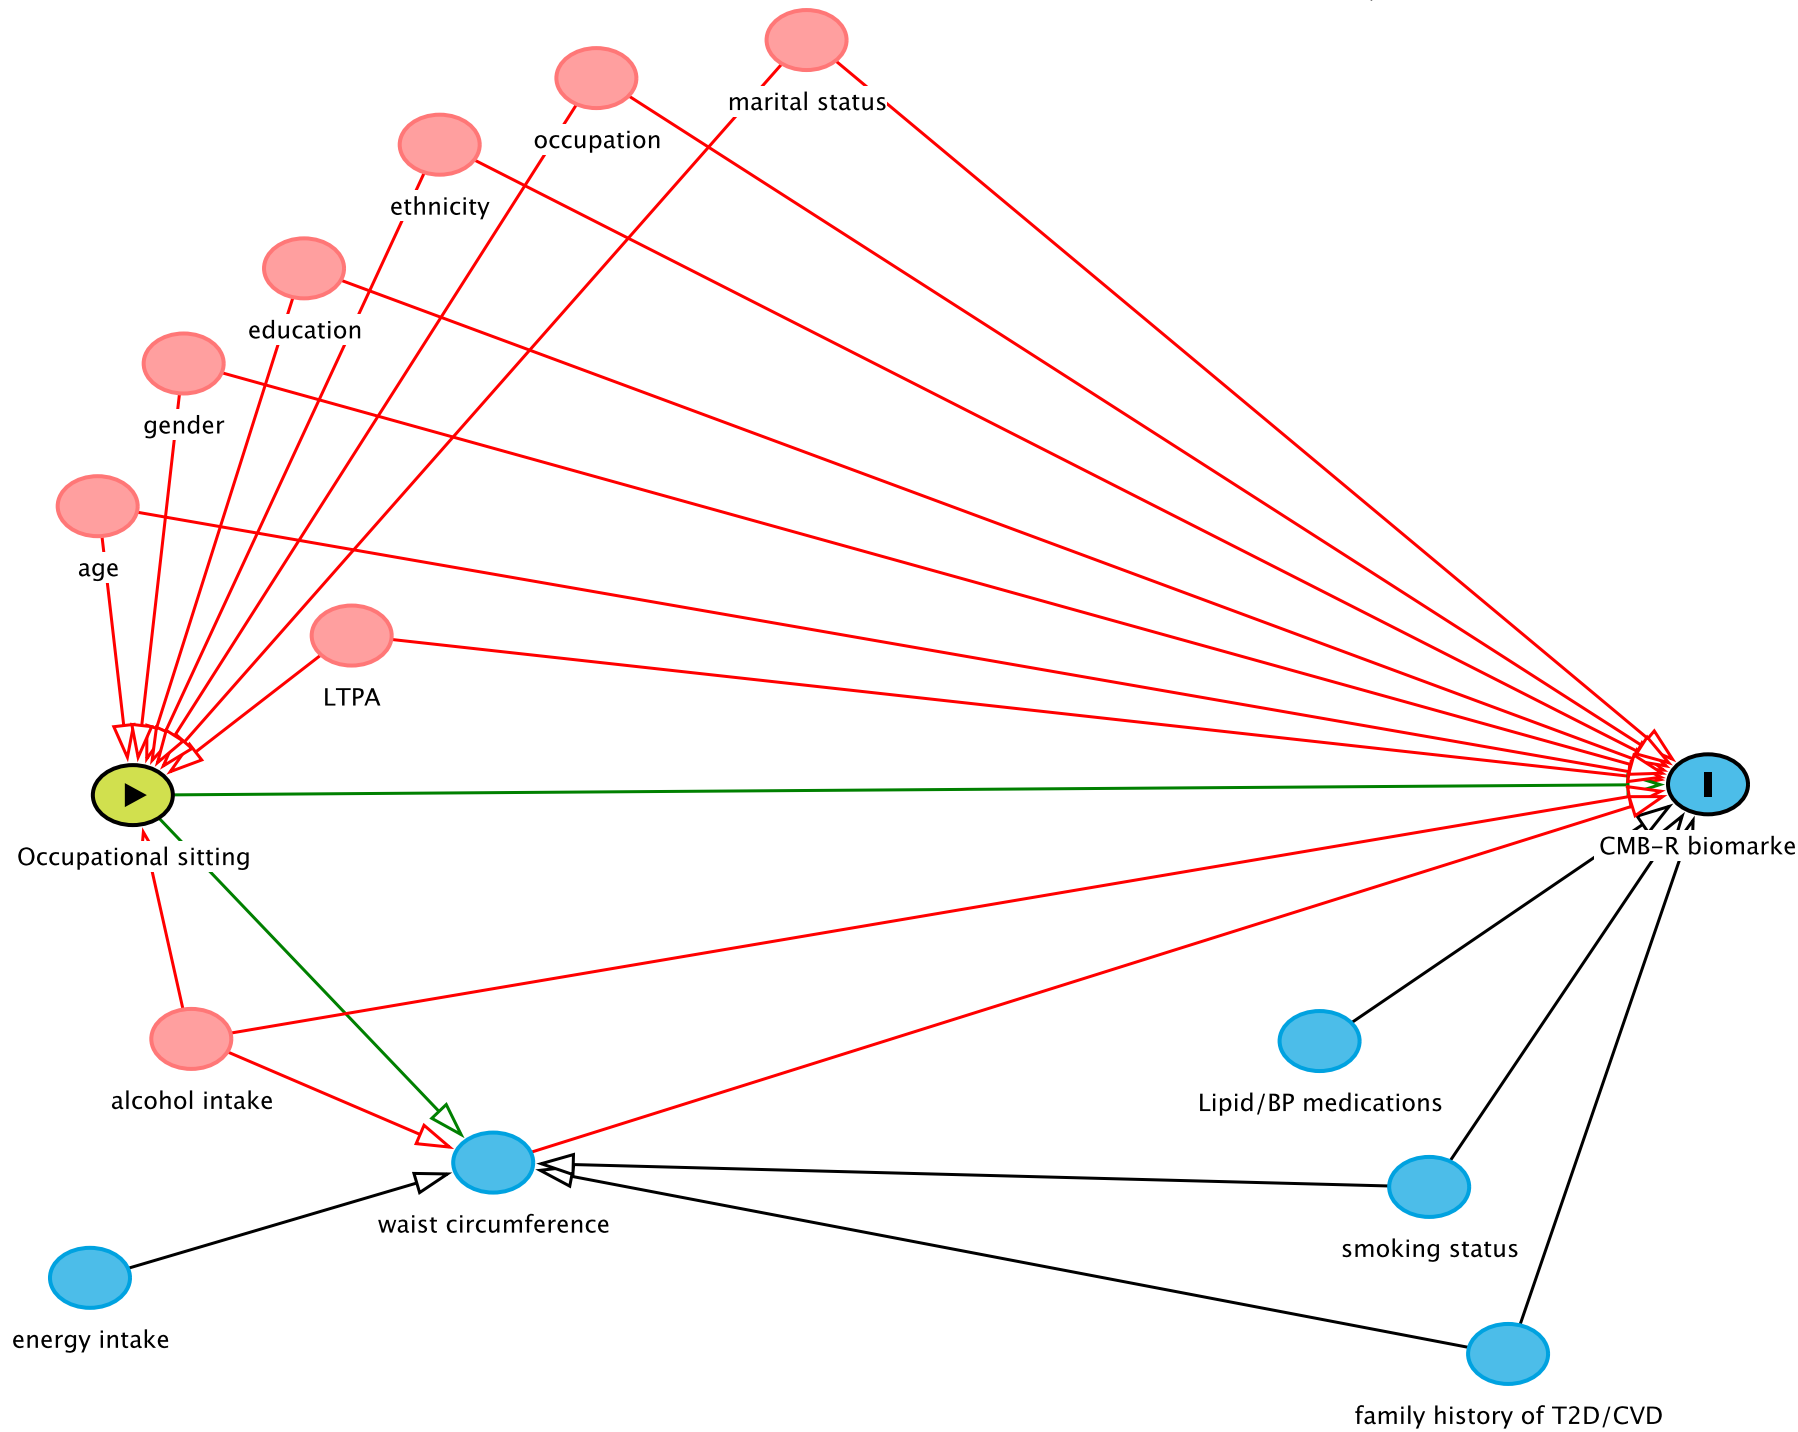

Directed Acyclic Graphs, Figure S1

LTPA, Leisure-time physical activity  
CMB-R, Cardiometabolic risk

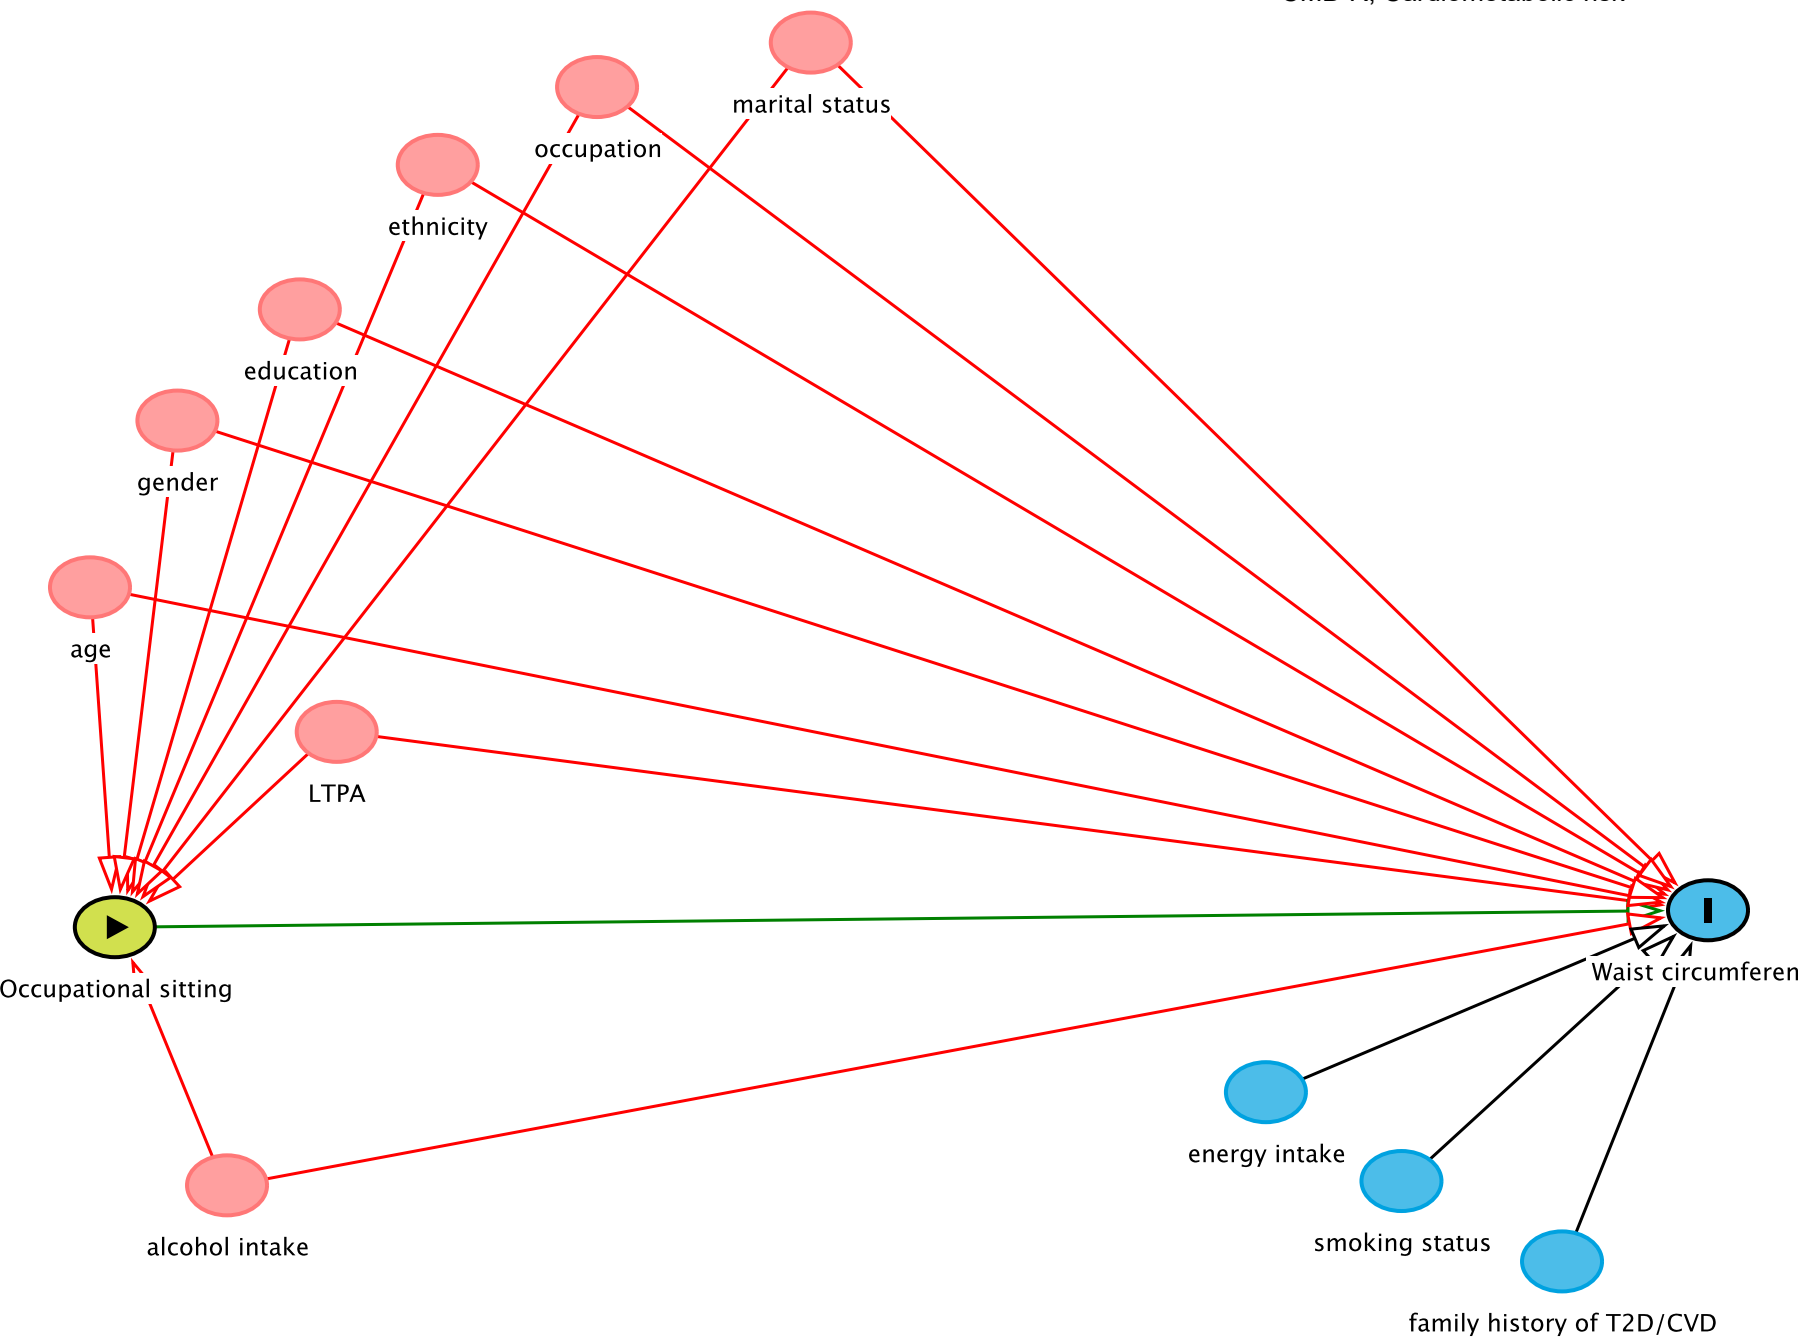

LTPA, Leisure-time physical activity  
CMB-R, Cardiometabolic risk

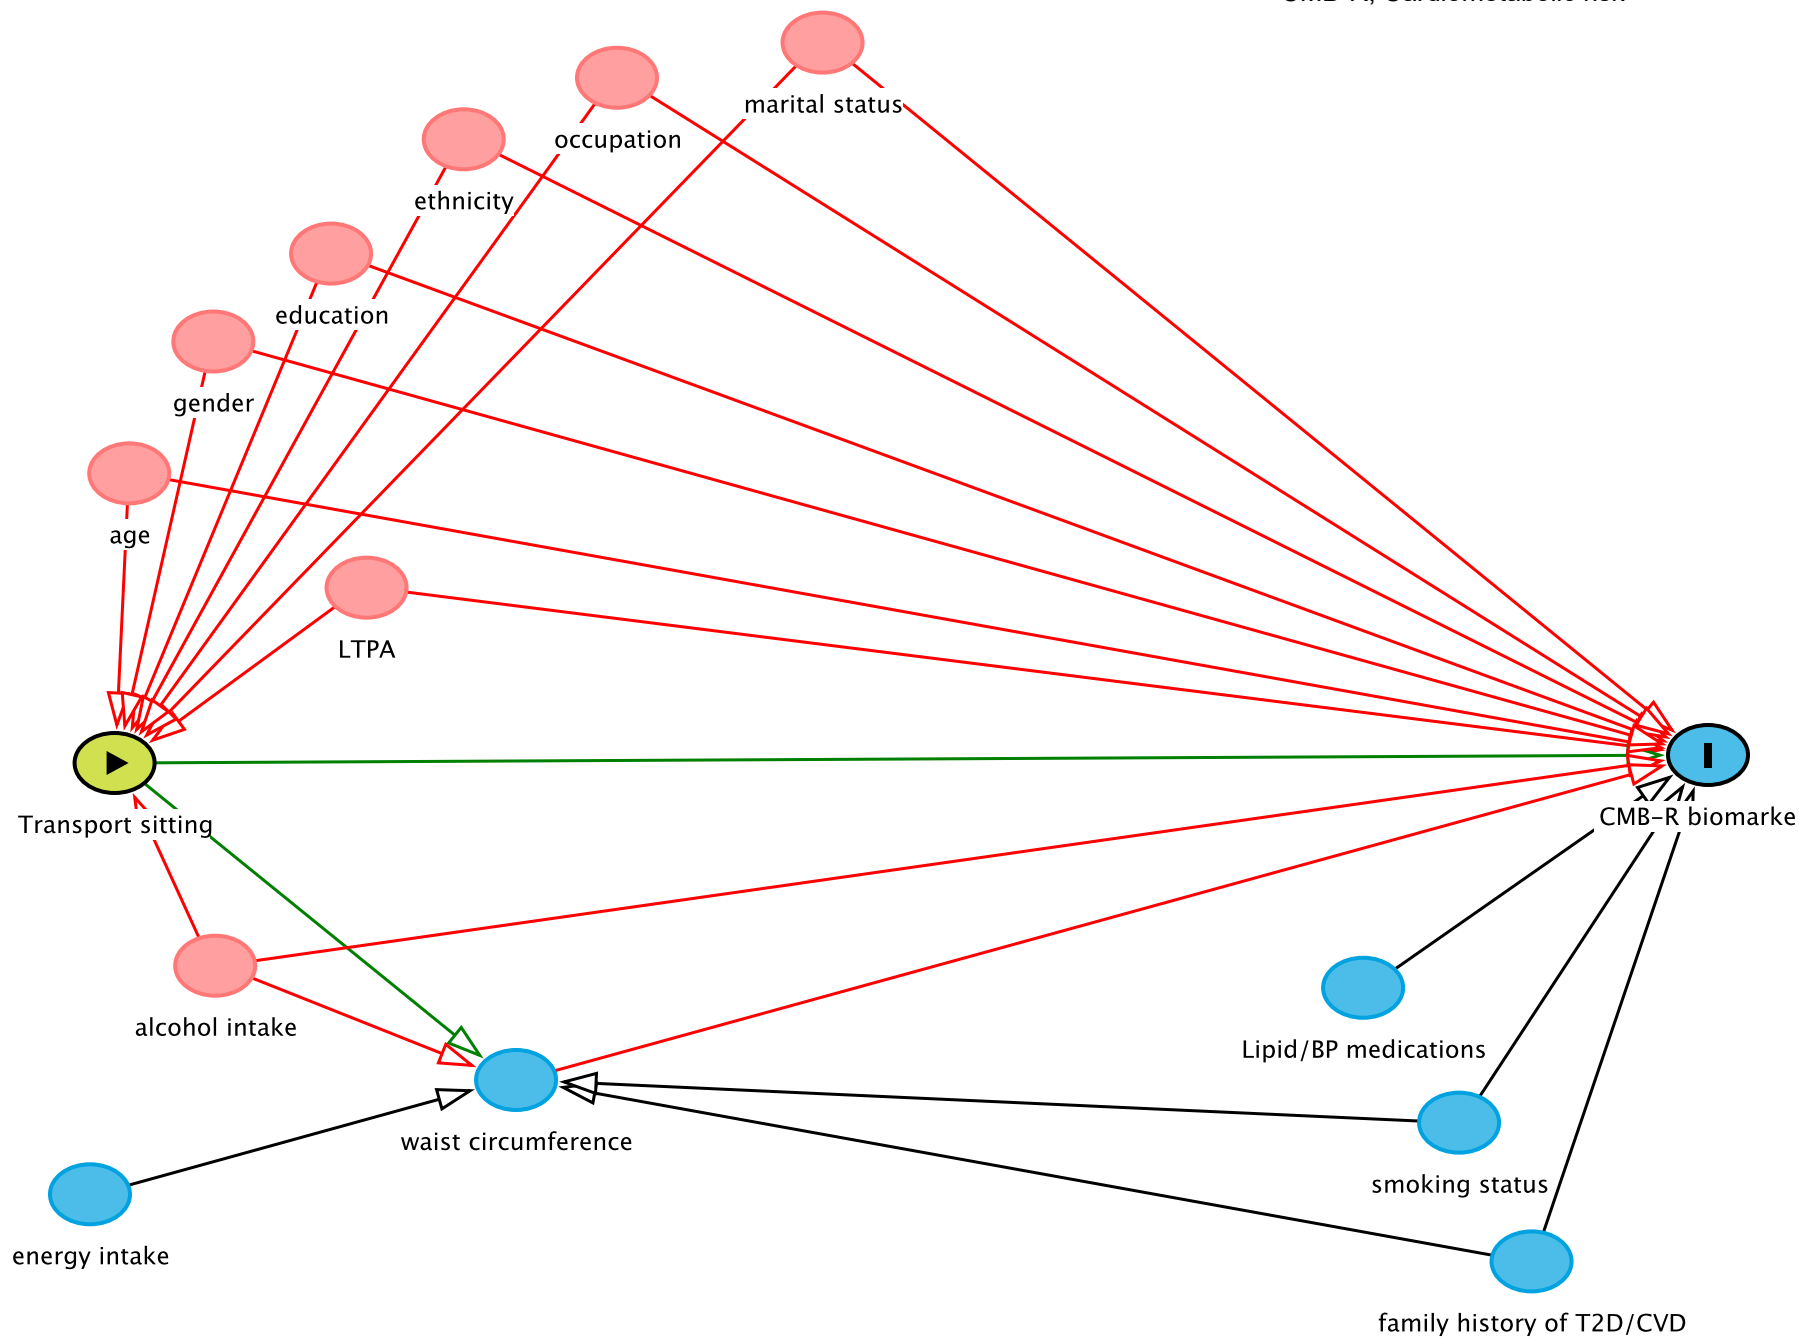

LTPA, Leisure-time physical activity  
CMB-R, Cardiometabolic risk

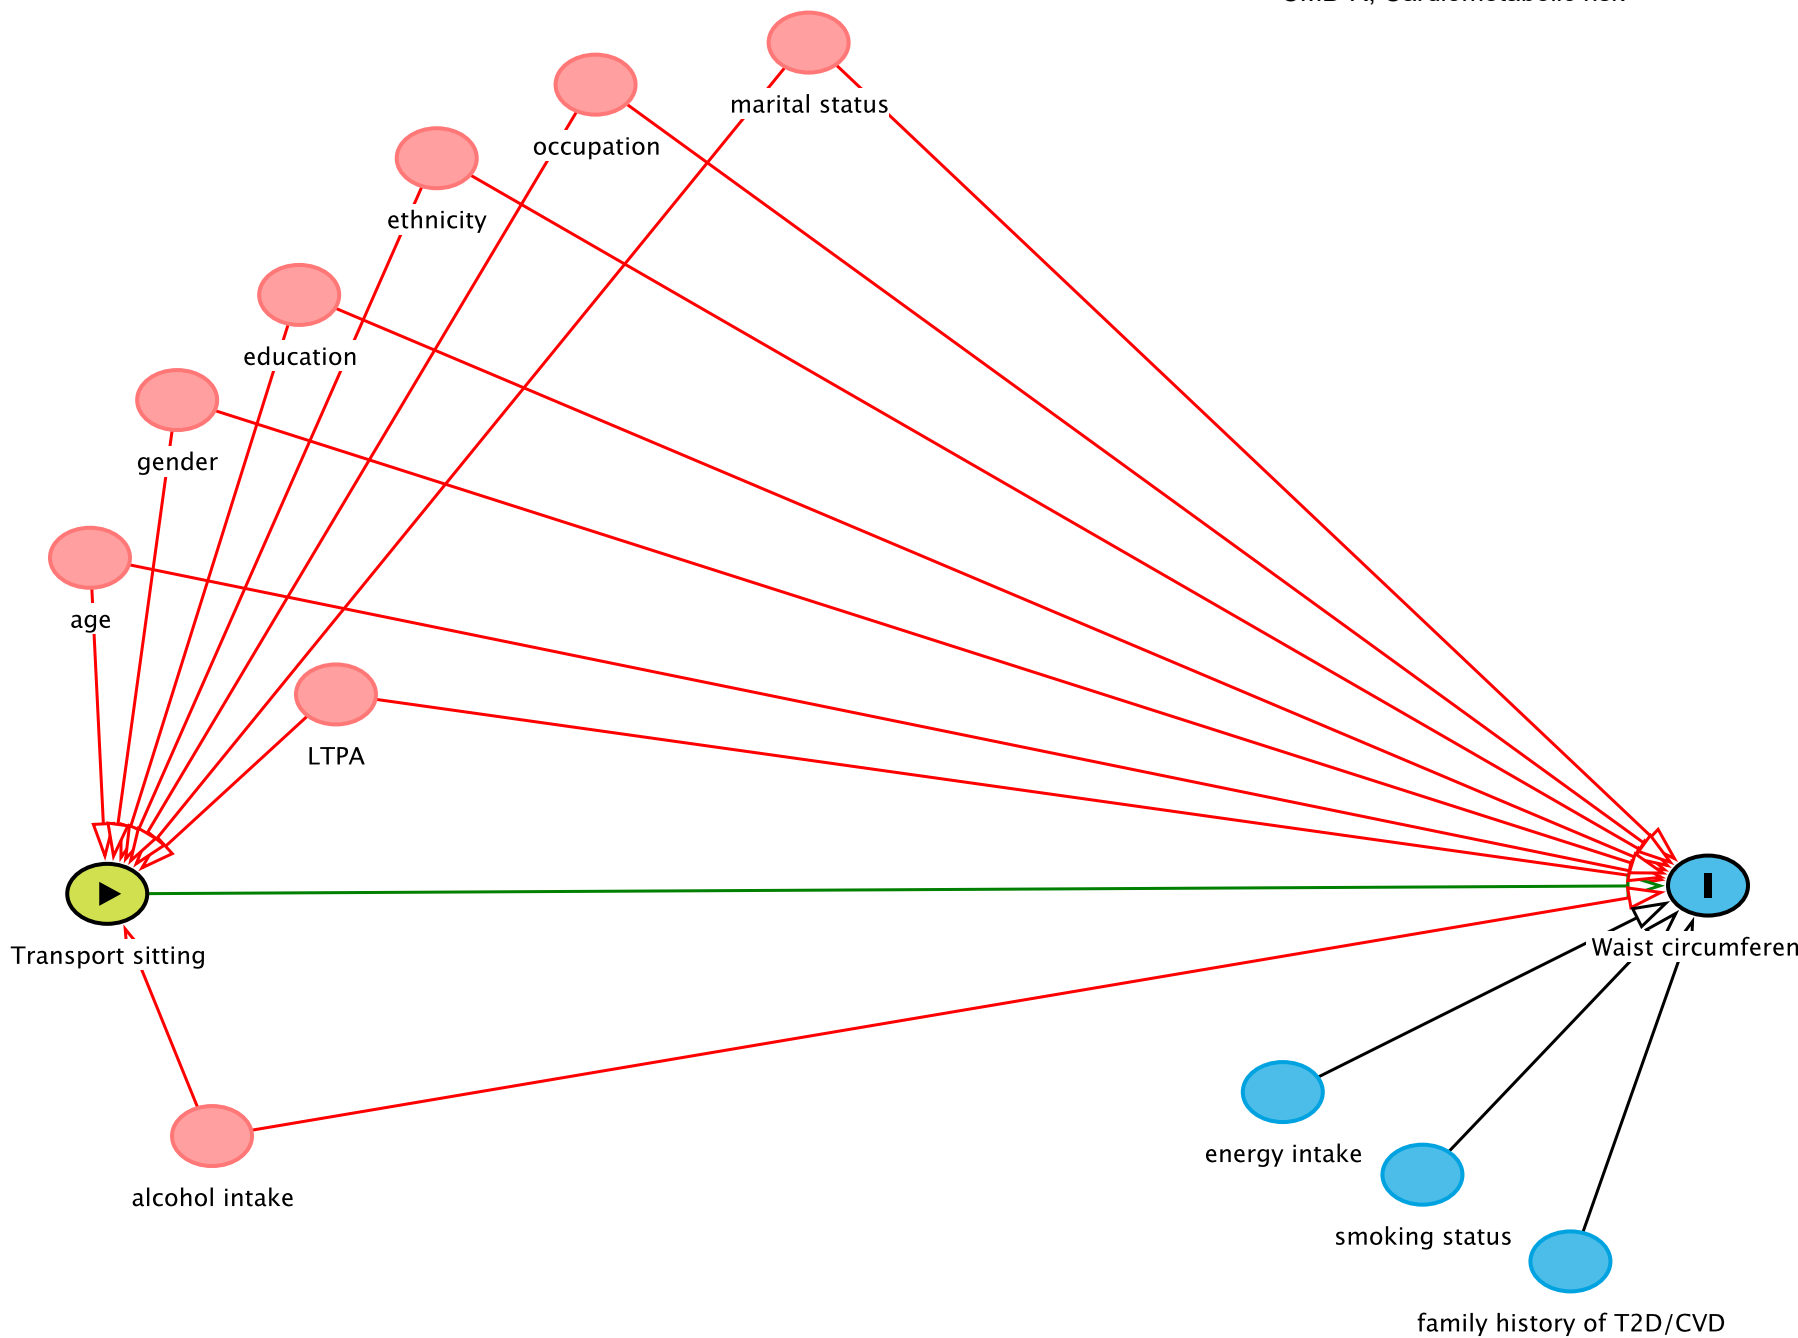

LTPA, Leisure-time physical activity  
CMB-R, Cardiometabolic risk

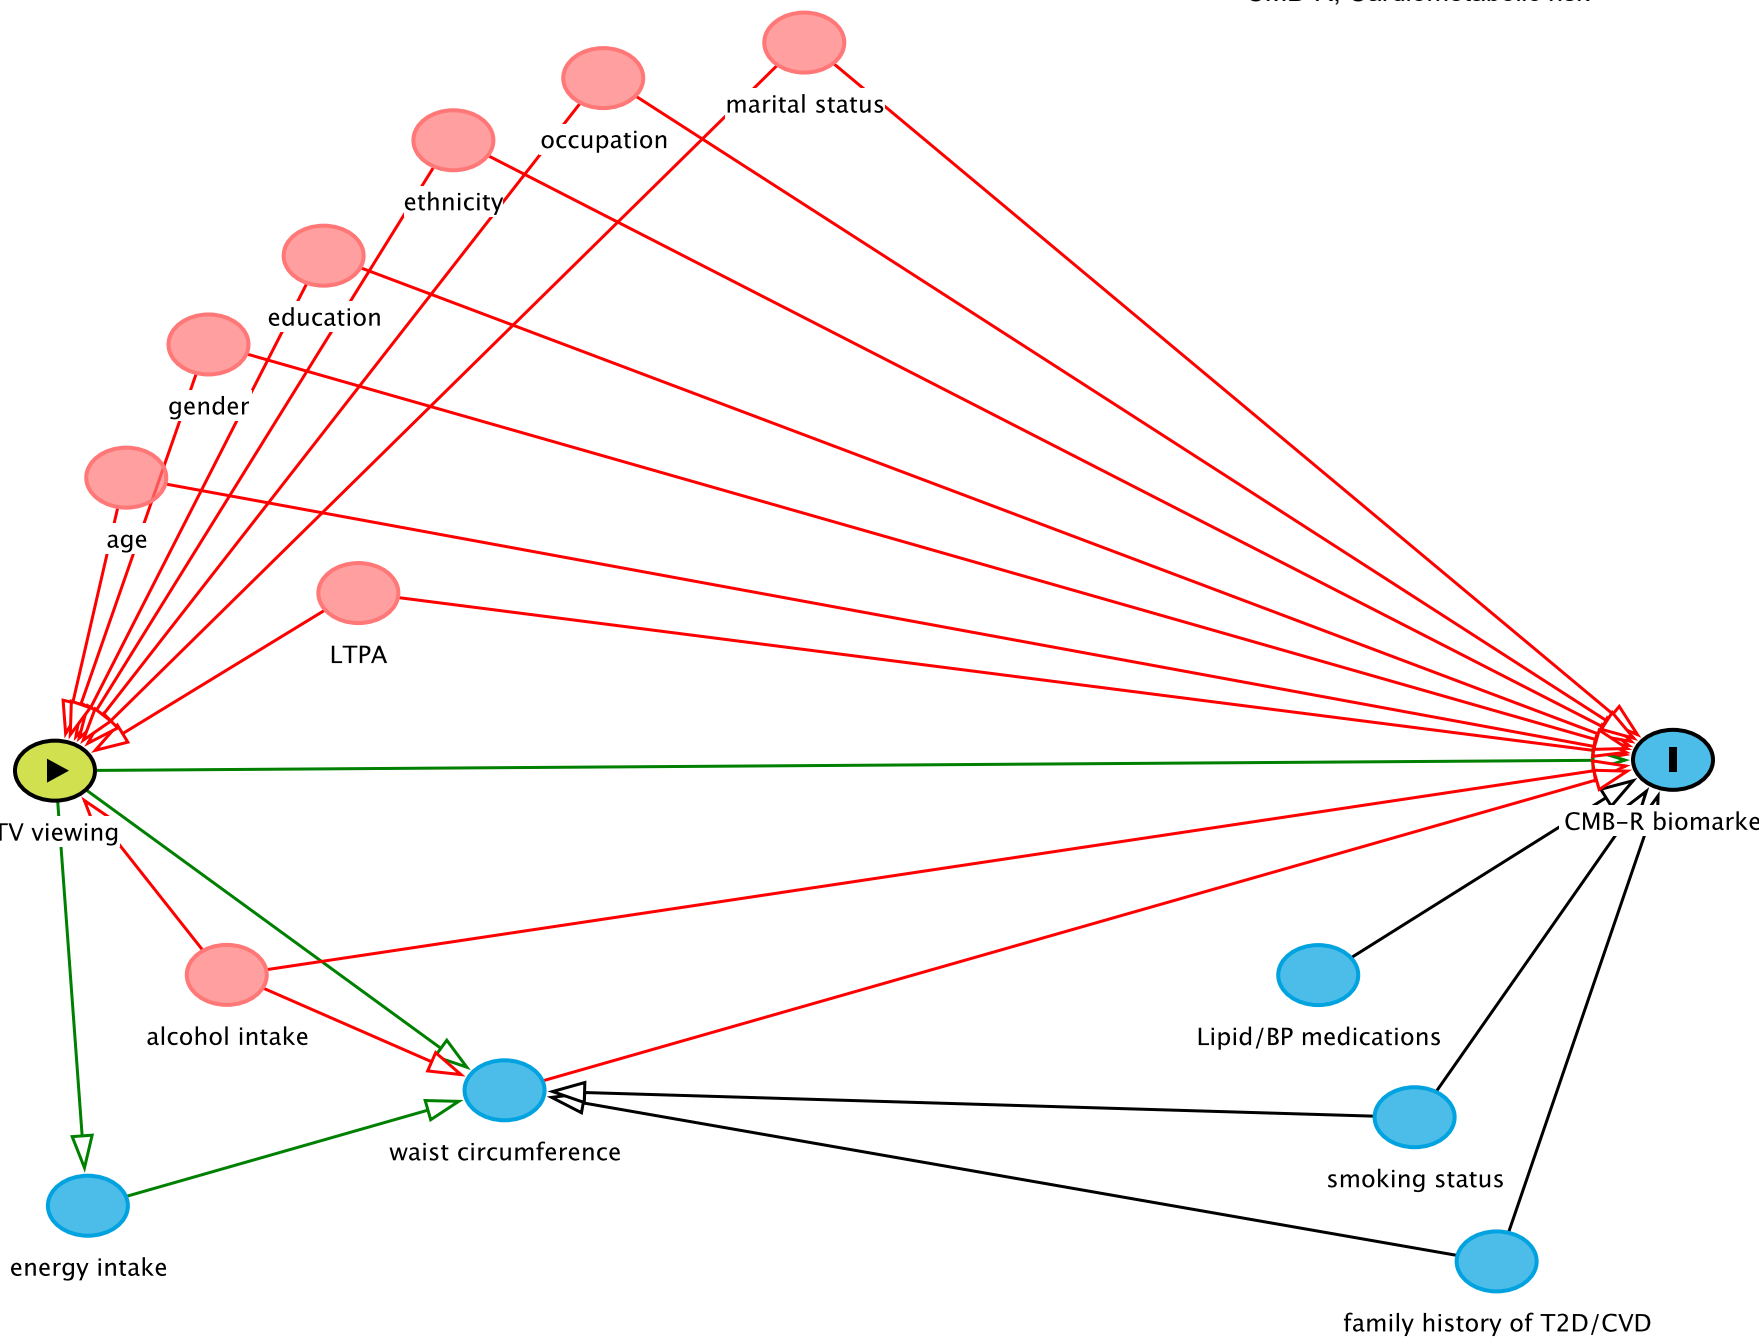

LTPA, Leisure-time physical activity  
CMB-R, Cardiometabolic risk

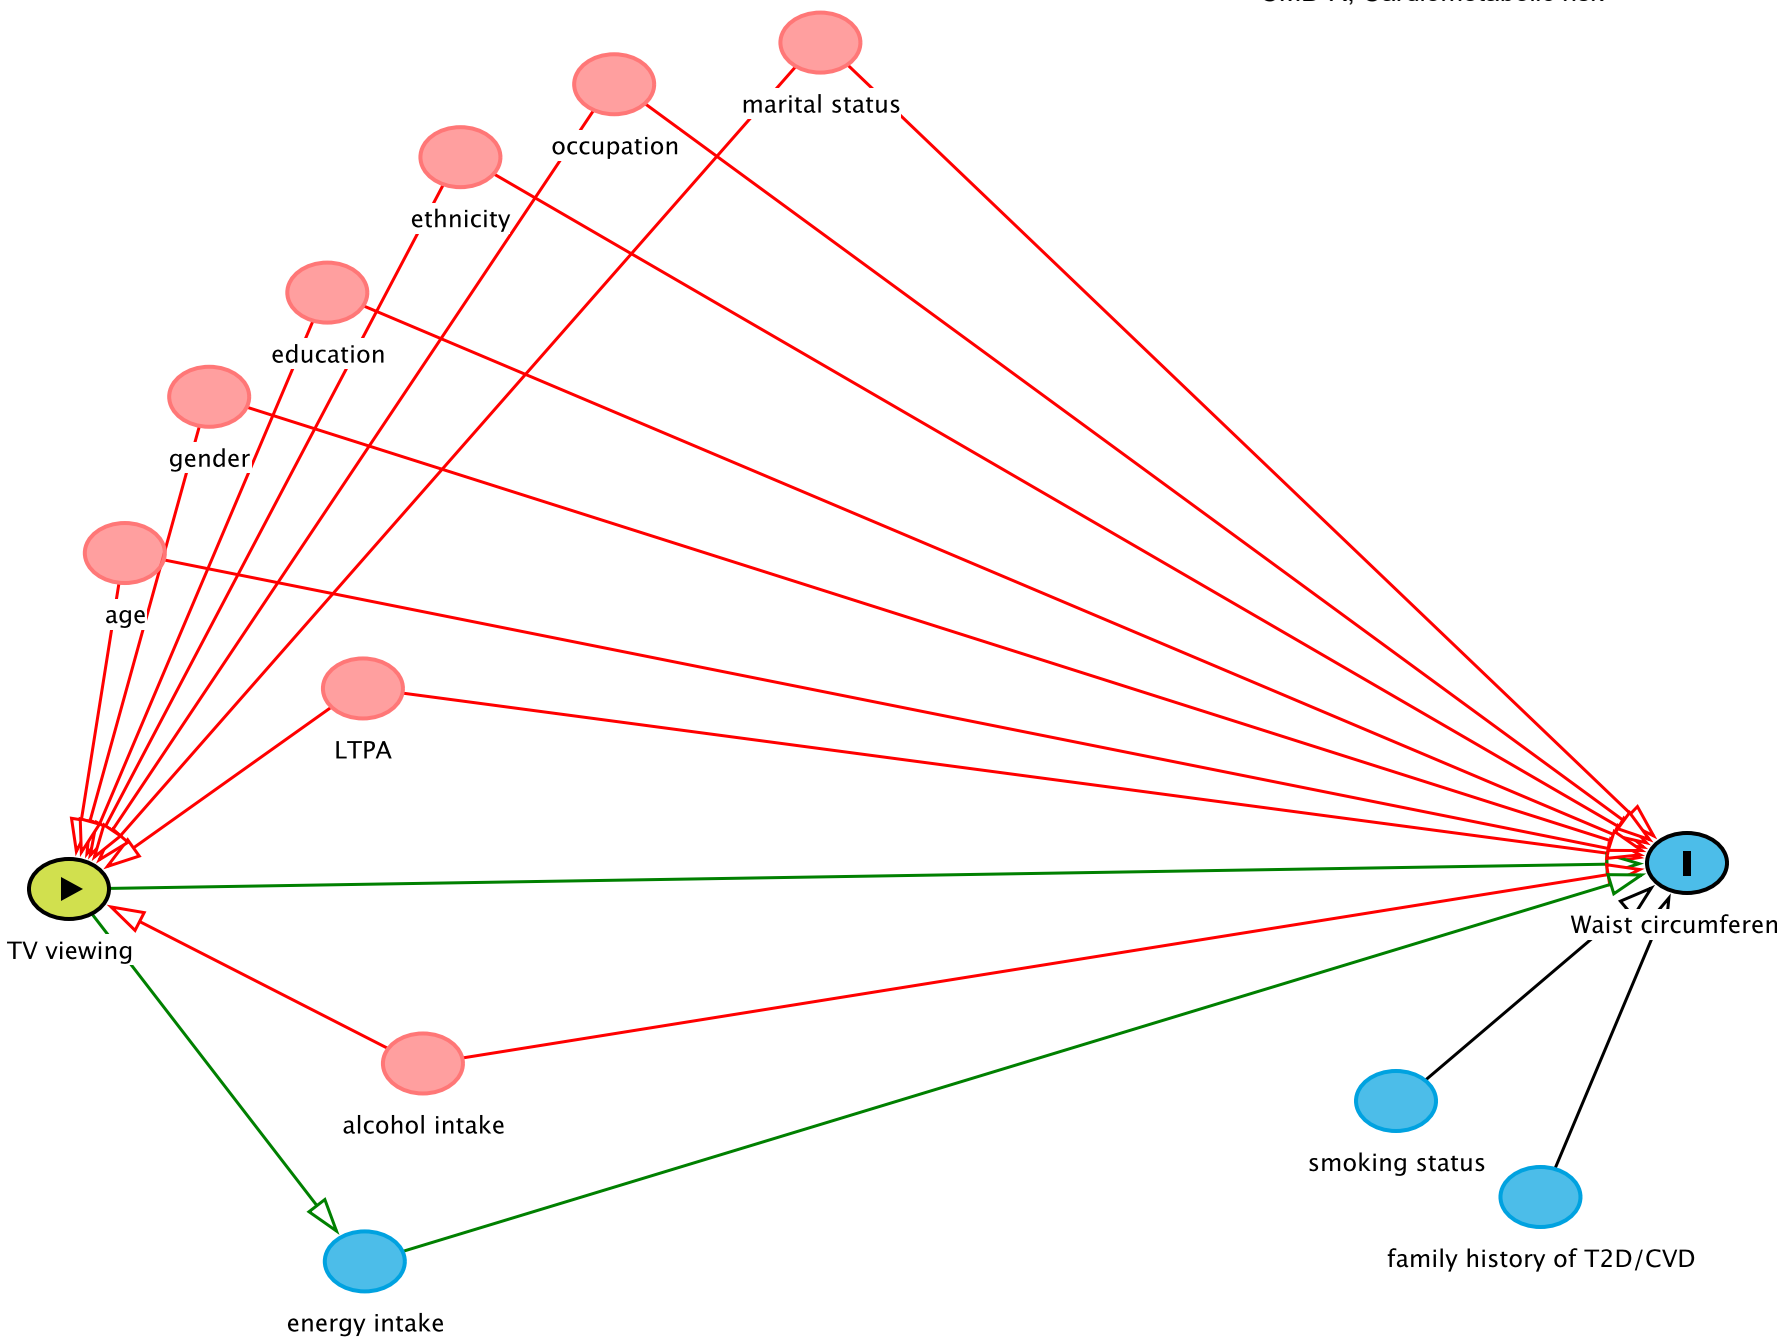

LTPA, Leisure-time physical activity  
CMB-R, Cardiometabolic risk

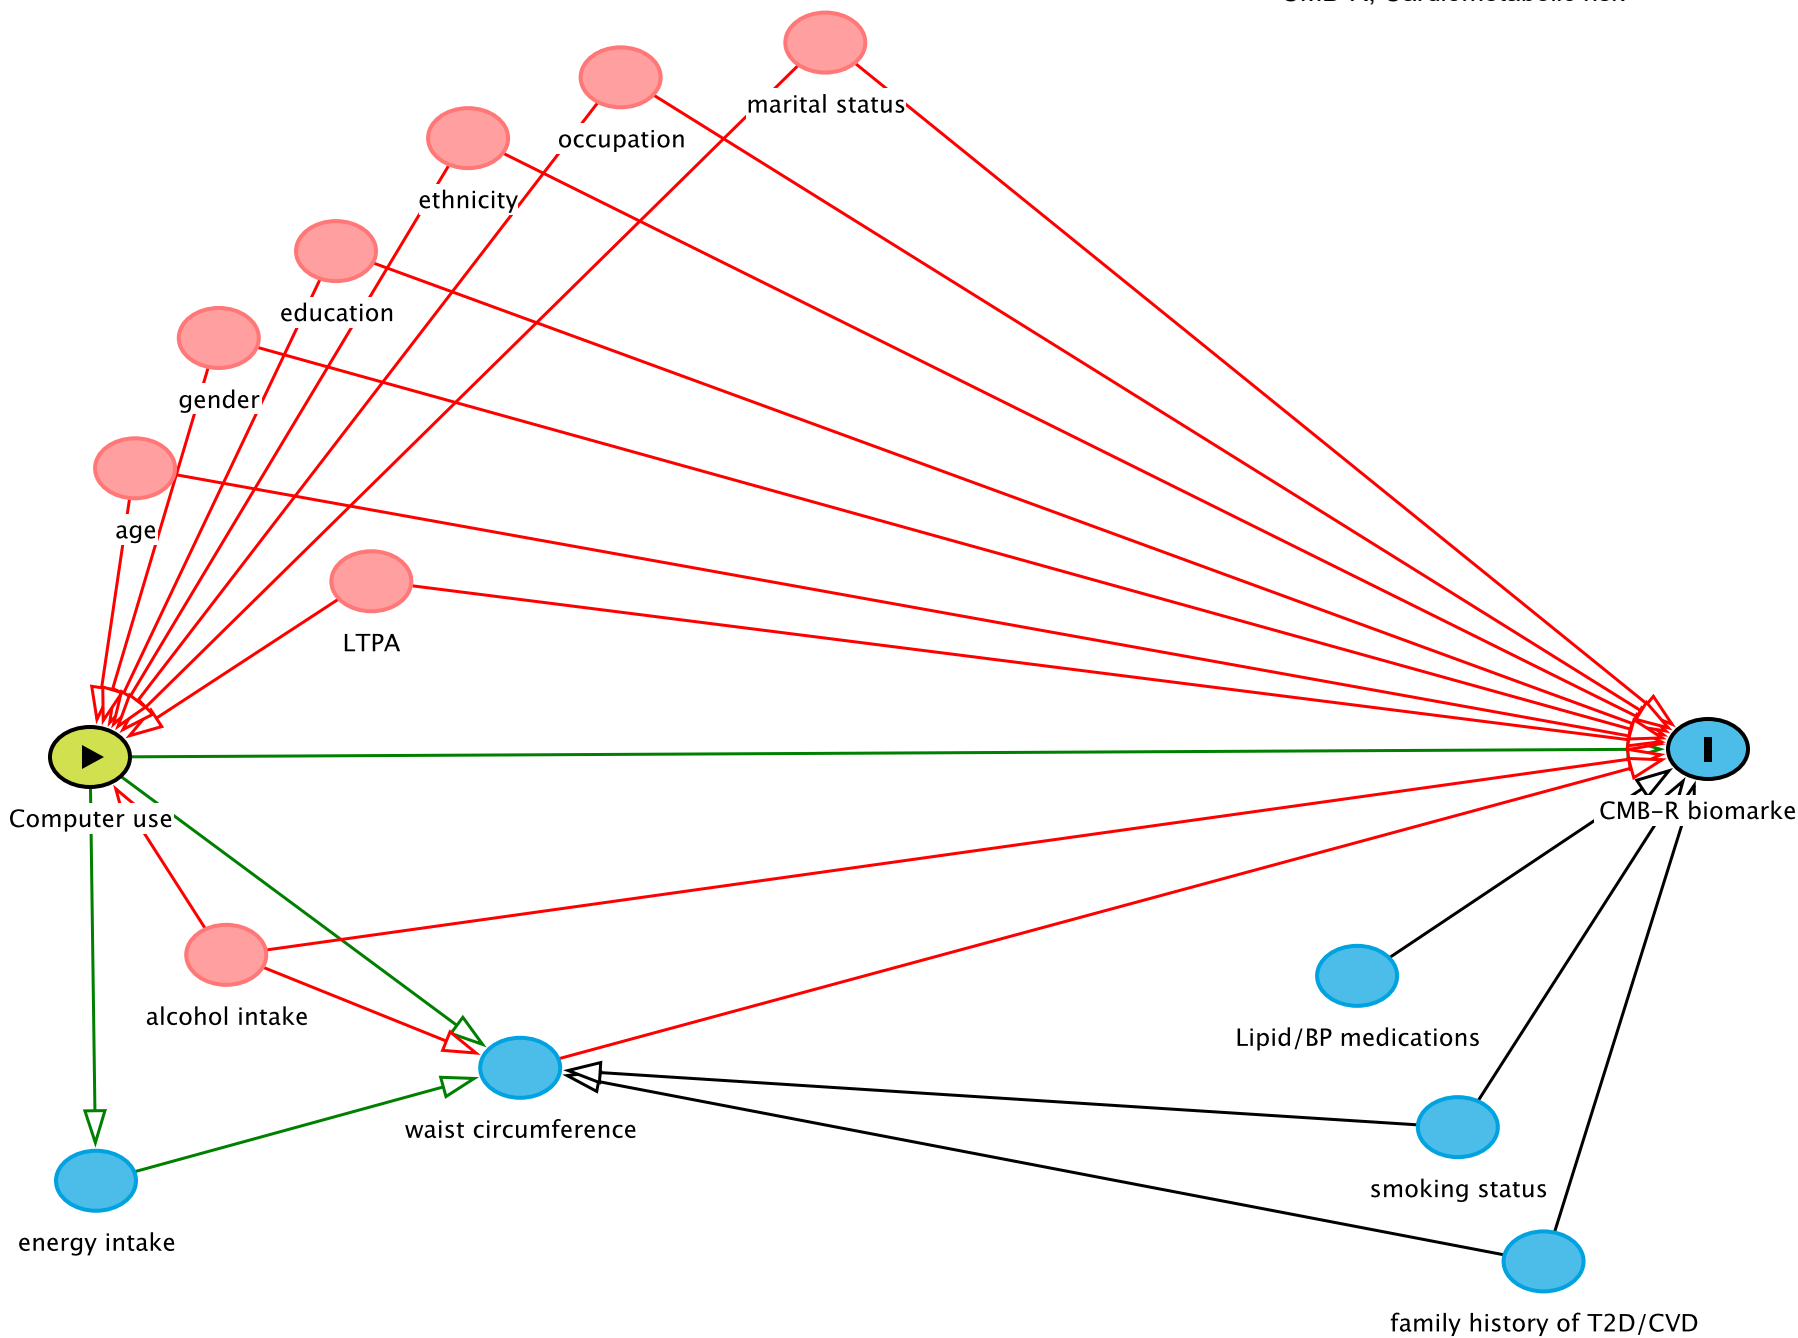

LTPA, Leisure-time physical activity  
CMB-R, Cardiometabolic risk

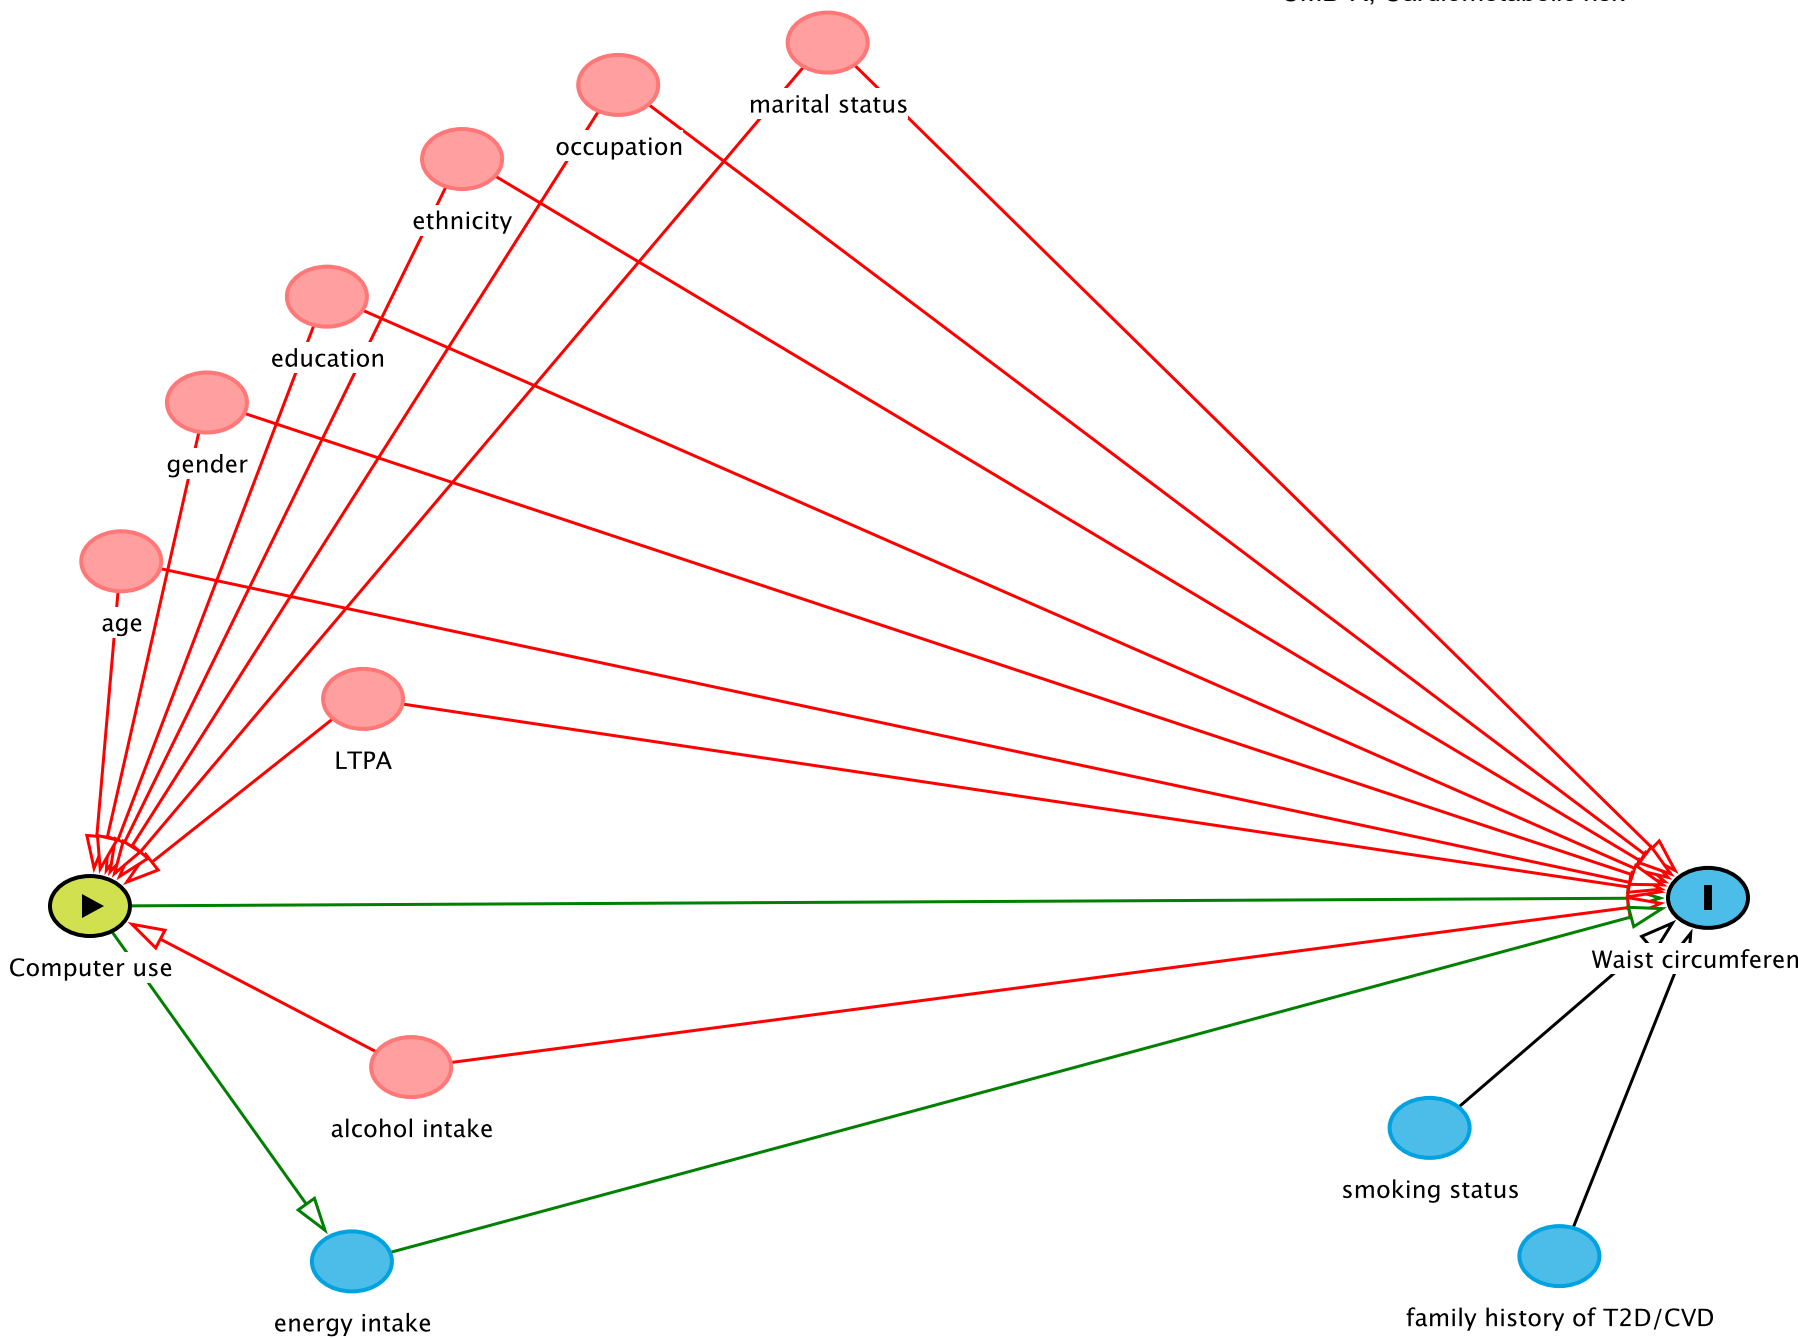

Supplement: 12966_2018_748_MOESM2_ESM.pdf [file 12966_2018_748_MOESM2_ESM.pdf]
