# Supplementary material for: Associations of context-specific sitting time with markers of cardiometabolic risk in Australian adults
Source: PubMed Central journal article supplement (PMC6245709; doi:10.1186/s12966-018-0748-3), 2018-11-20
Supplement: 12966_2018_748_MOESM4_ESM.pdf [file 12966_2018_748_MOESM4_ESM.pdf]

## 2hr postload glucose, mmol/L

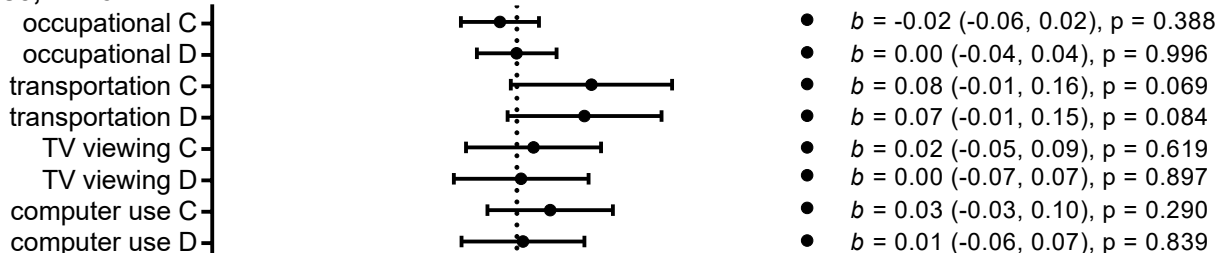

## Fasting glucose, mmol/L

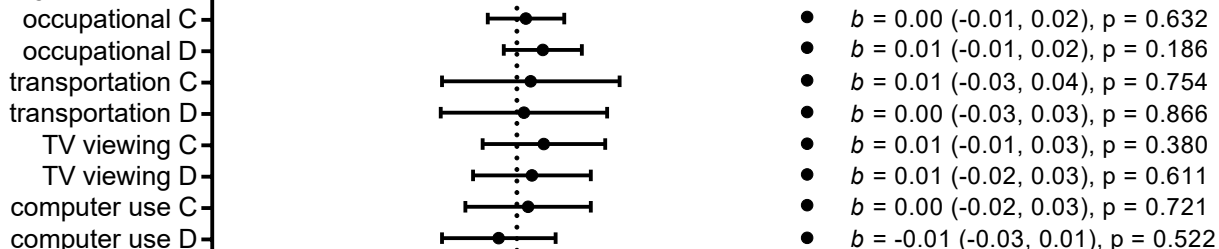

## Systolic blood pressure, mmHg

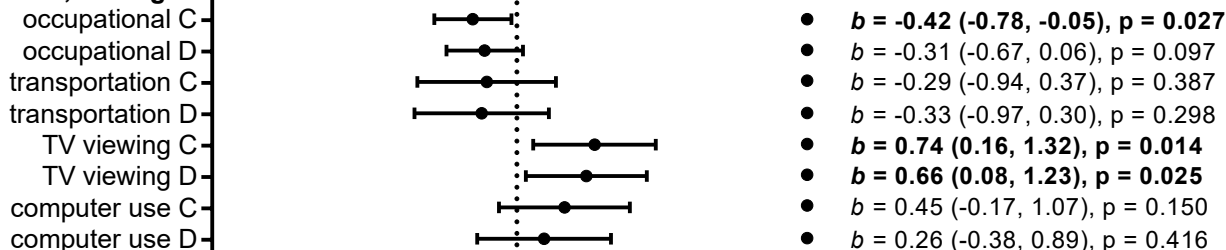

## Diastolic blood pressure, mmHg

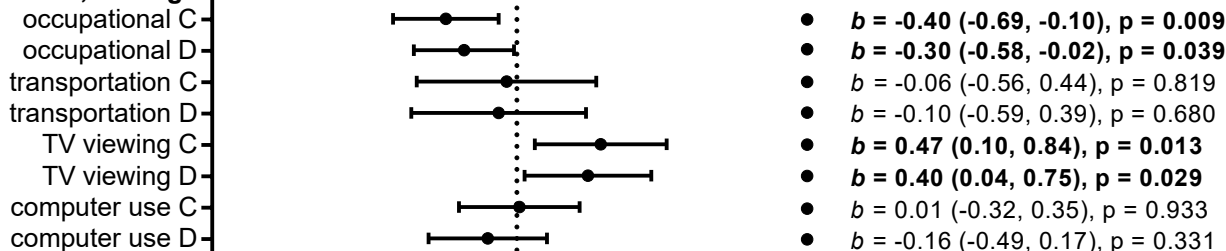

## Triglycerides, mmol/L

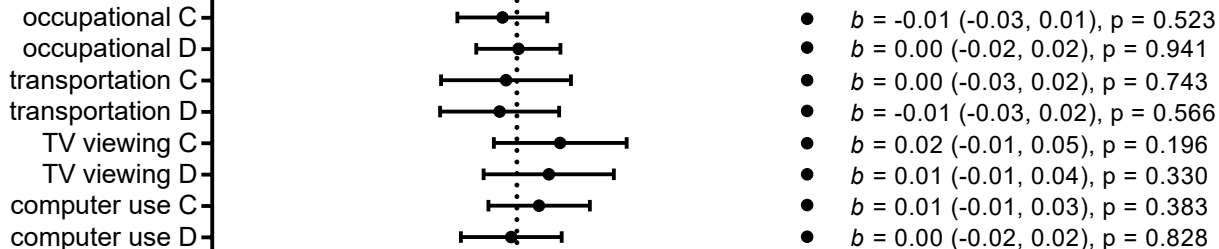

## HDL cholesterol, mmol/L

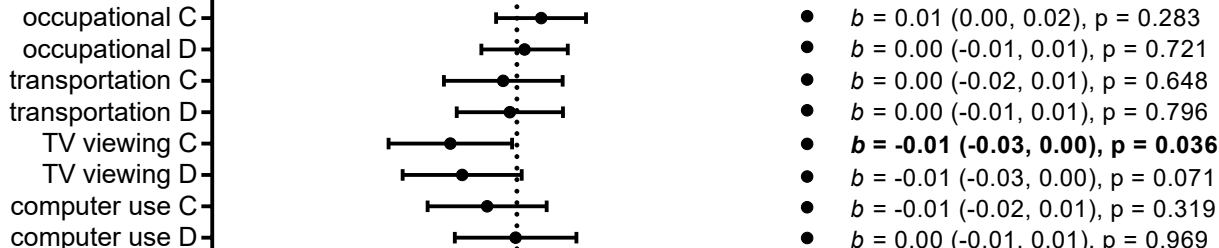

## LDL/HDL cholesterol ratio

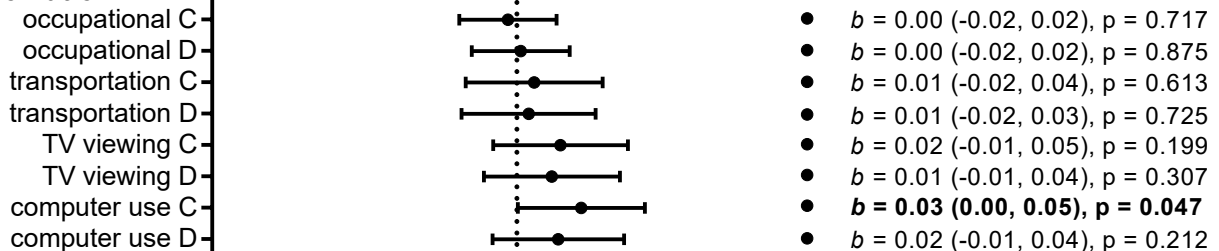

-0.15 -0.10 -0.05 0.00 0.05 0.10 0.15  
SD difference in biomarker (95% CI) per h/day sitting
